# Supplementary material for: Transition metal- and catalyst-free one-pot green method for the synthesis of N-sulfonyl amidines via direct reaction of sulfonyl azides with amines
Source: Royal Society of Chemistry journal article supplement (doi:10.1039/d0ra04545d), 2020-01-01
Supplement: d0ra04545d1.pdf [file d0ra04545d1.pdf]

## Supporting Information

# Transition Metal- and Catalyst-Free One-Pot Green Method for the Synthesis of *N*-Sulfonyl amidines *via* Direct Reaction of Sulfonyl Azides with Amines

*Babak Kaboudin,<sup>\*a</sup> Saeed Torabi,<sup>a</sup> Foad Kazemi,<sup>a</sup> and Hiroshi Aoyama<sup>b</sup>*

<sup>a</sup>\*Department of Chemistry, Institute for Advanced Studies in Basic Sciences (IASBS),  
Gava Zang, Zanjan 45137-66731, Iran

<sup>b</sup>School of Pharmacy, Tokyo University of Pharmacy and Life Sciences,  
1432-1 Horinouchi, Hachioji, Tokyo 192-0392, Japan

E-mail: [kaboudin@gmail.com](mailto:kaboudin@gmail.com), Tel: +98 24 33153220, Fax: +98 24 33153232

### Table of Contents

|                                                         |        |
|---------------------------------------------------------|--------|
| NMR Spectra for the compounds <b>3a-3p</b> and <b>4</b> | S3-S19 |
| Figure S1: <sup>1</sup> H NMR Spectra of <b>3a</b>      |        |
| Figure S2: <sup>13</sup> C NMR Spectra of <b>3a</b>     |        |
| Figure S3: <sup>1</sup> H NMR Spectra of <b>3b</b>      |        |
| Figure S4: <sup>13</sup> C NMR Spectra of <b>3b</b>     |        |
| Figure S5: <sup>1</sup> H NMR Spectra of <b>3c</b>      |        |
| Figure S6: <sup>13</sup> C NMR Spectra of <b>3c</b>     |        |
| Figure S7: <sup>1</sup> H NMR Spectra of <b>3d</b>      |        |
| Figure S8: <sup>13</sup> C NMR Spectra of <b>3d</b>     |        |

Figure S9:  $^1\text{H}$  NMR Spectra of **3e**  
Figure S10:  $^{13}\text{C}$  NMR Spectra of **3e**  
Figure S11:  $^1\text{H}$  NMR Spectra of **3f**  
Figure S12:  $^{13}\text{C}$  NMR Spectra of **3f**  
Figure S13:  $^1\text{H}$  NMR Spectra of **3g**  
Figure S14:  $^{13}\text{C}$  NMR Spectra of **3g**  
Figure S15:  $^1\text{H}$  NMR Spectra of **3h**  
Figure S16:  $^{13}\text{C}$  NMR Spectra of **3h**  
Figure S17:  $^1\text{H}$  NMR Spectra of **3i**  
Figure S18:  $^{13}\text{C}$  NMR Spectra of **3i**  
Figure S19:  $^1\text{H}$  NMR Spectra of **3j**  
Figure S20:  $^{13}\text{C}$  NMR Spectra of **3j**  
Figure S21:  $^1\text{H}$  NMR Spectra of **3k**  
Figure S22:  $^{13}\text{C}$  NMR Spectra of **3k**  
Figure S23:  $^1\text{H}$  NMR Spectra of **3l**  
Figure S24:  $^{13}\text{C}$  NMR Spectra of **3l**  
Figure S25:  $^1\text{H}$  NMR Spectra of **3m**  
Figure S26:  $^{13}\text{C}$  NMR Spectra of **3m**  
Figure S27:  $^1\text{H}$  NMR Spectra of **3n**  
Figure S28:  $^{13}\text{C}$  NMR Spectra of **3n**  
Figure S29:  $^1\text{H}$  NMR Spectra of **3o**  
Figure S30:  $^{13}\text{C}$  NMR Spectra of **3o**  
Figure S31:  $^1\text{H}$  NMR Spectra of **3p**  
Figure S32:  $^{13}\text{C}$  NMR Spectra of **3p**  
Figure S33:  $^1\text{H}$  NMR Spectra of **4**  
Figure S34:  $^{13}\text{C}$  NMR Spectra of **4**

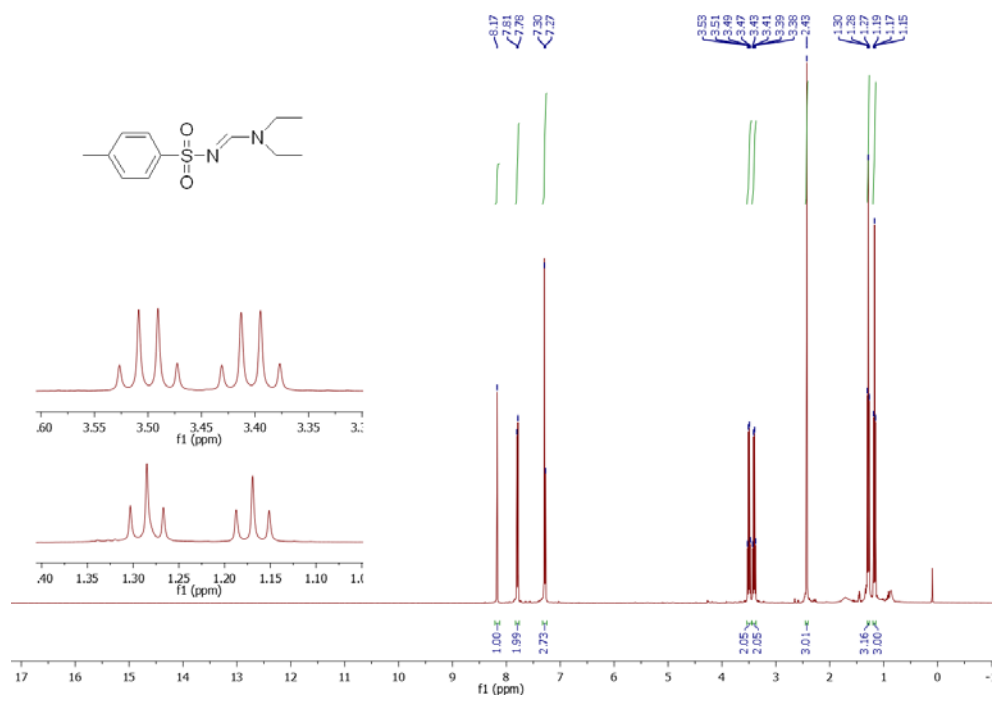

Figure S1:  $^1\text{H}$  NMR Spectra of **3a**

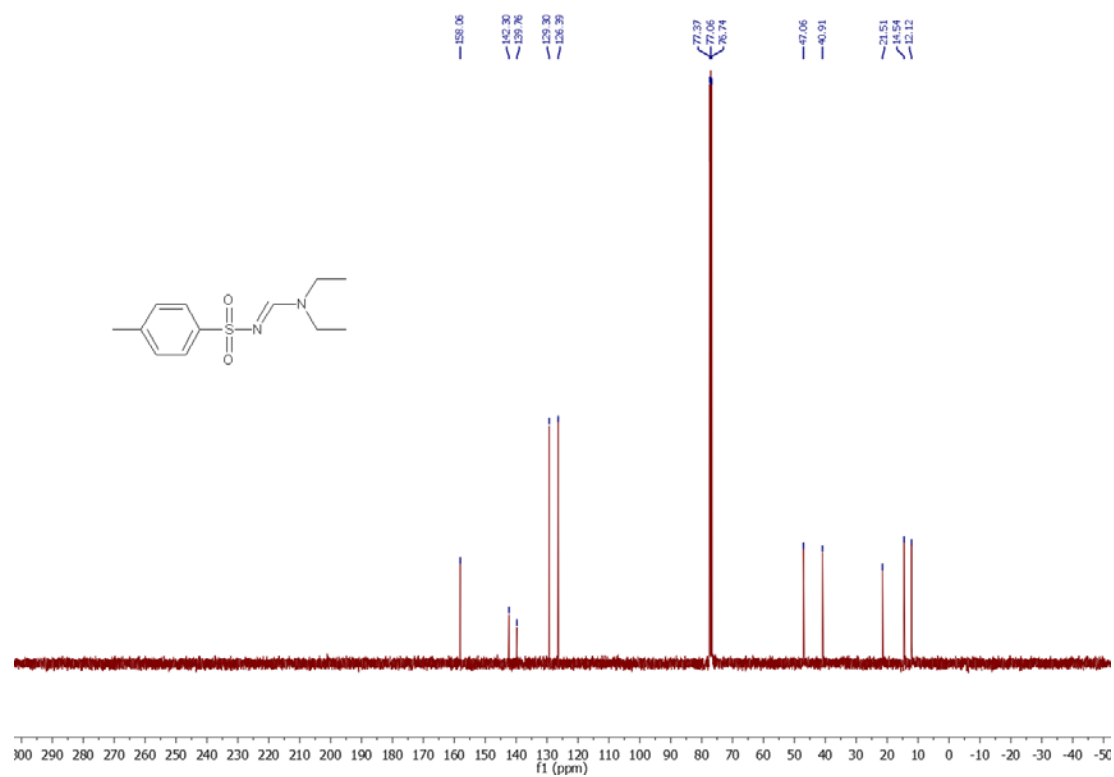

Figure S2:  $^{13}\text{C}$  NMR Spectra of **3a**

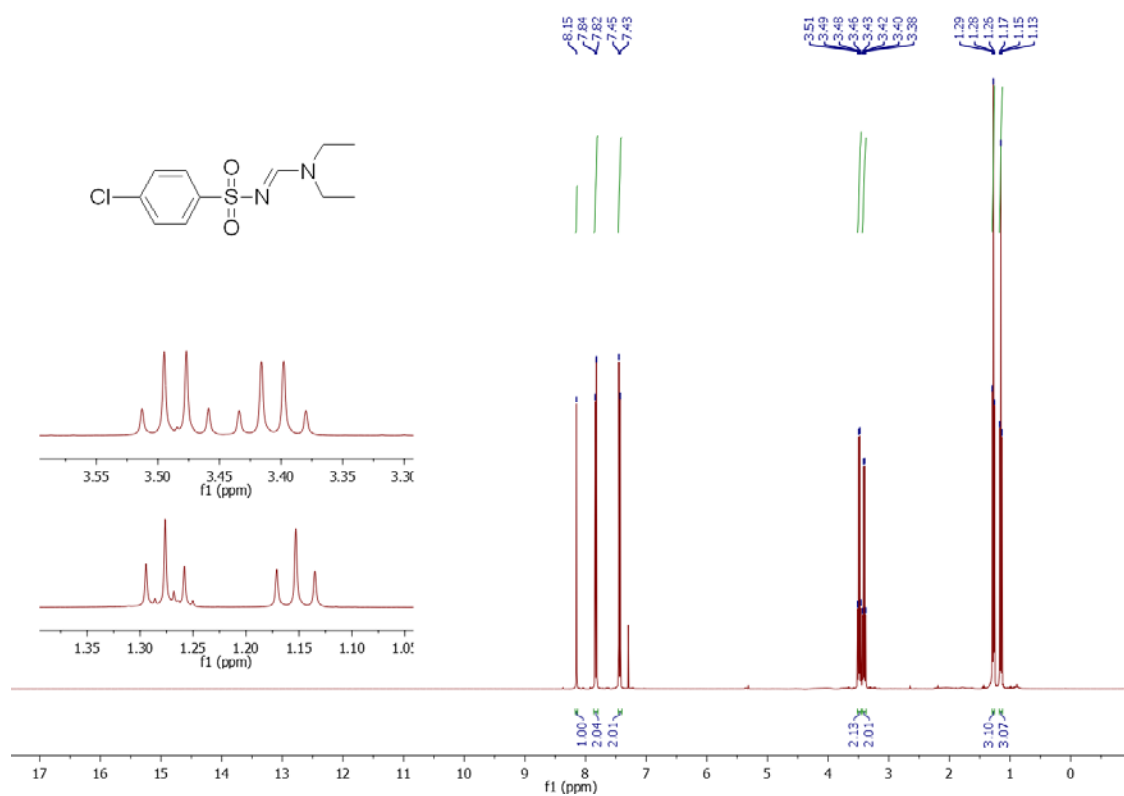

Figure S3:  $^1\text{H}$  NMR Spectra of **3b**

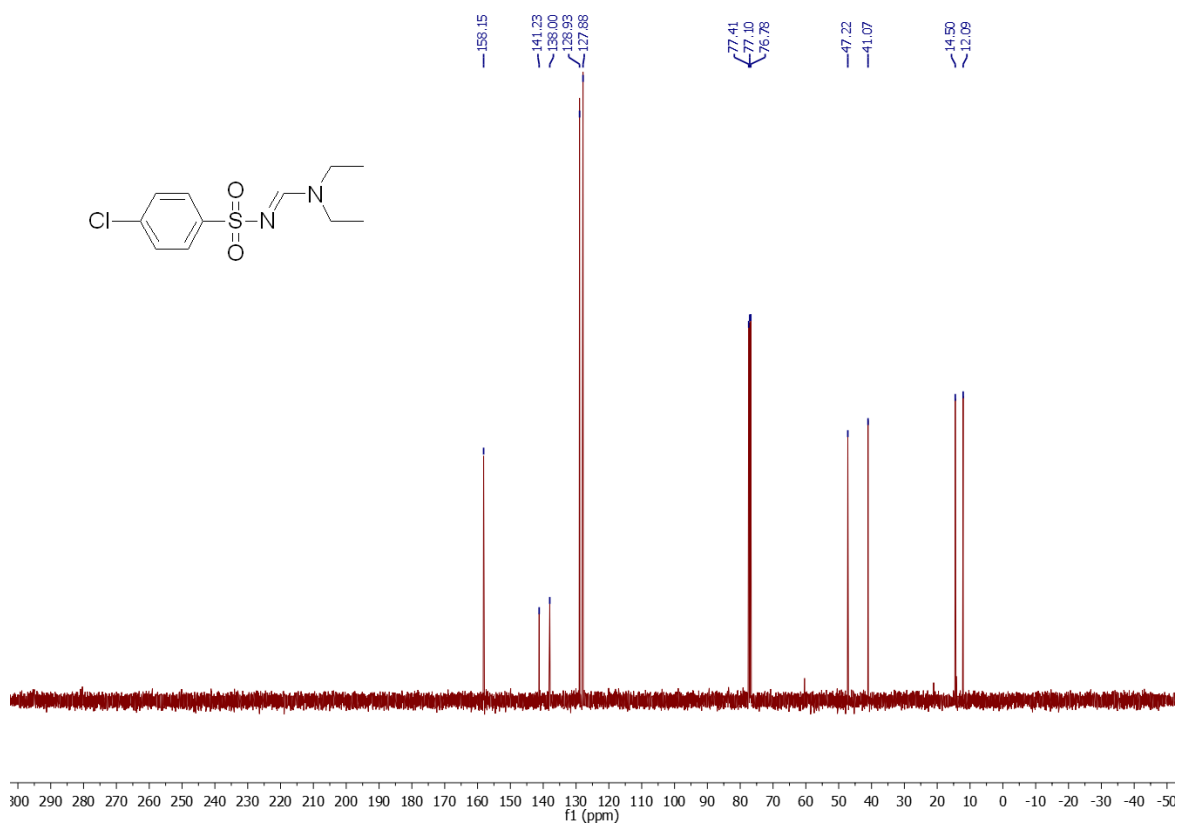

Figure S4:  $^{13}\text{C}$  NMR Spectra of **3b**

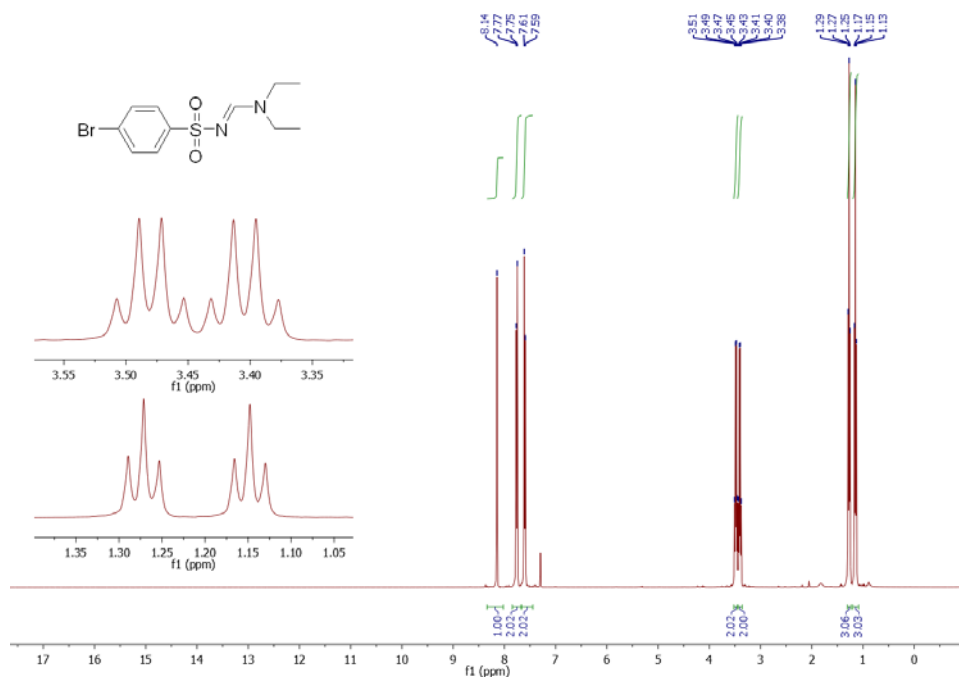

Figure S5:  $^1\text{H}$  NMR Spectra of **3c**

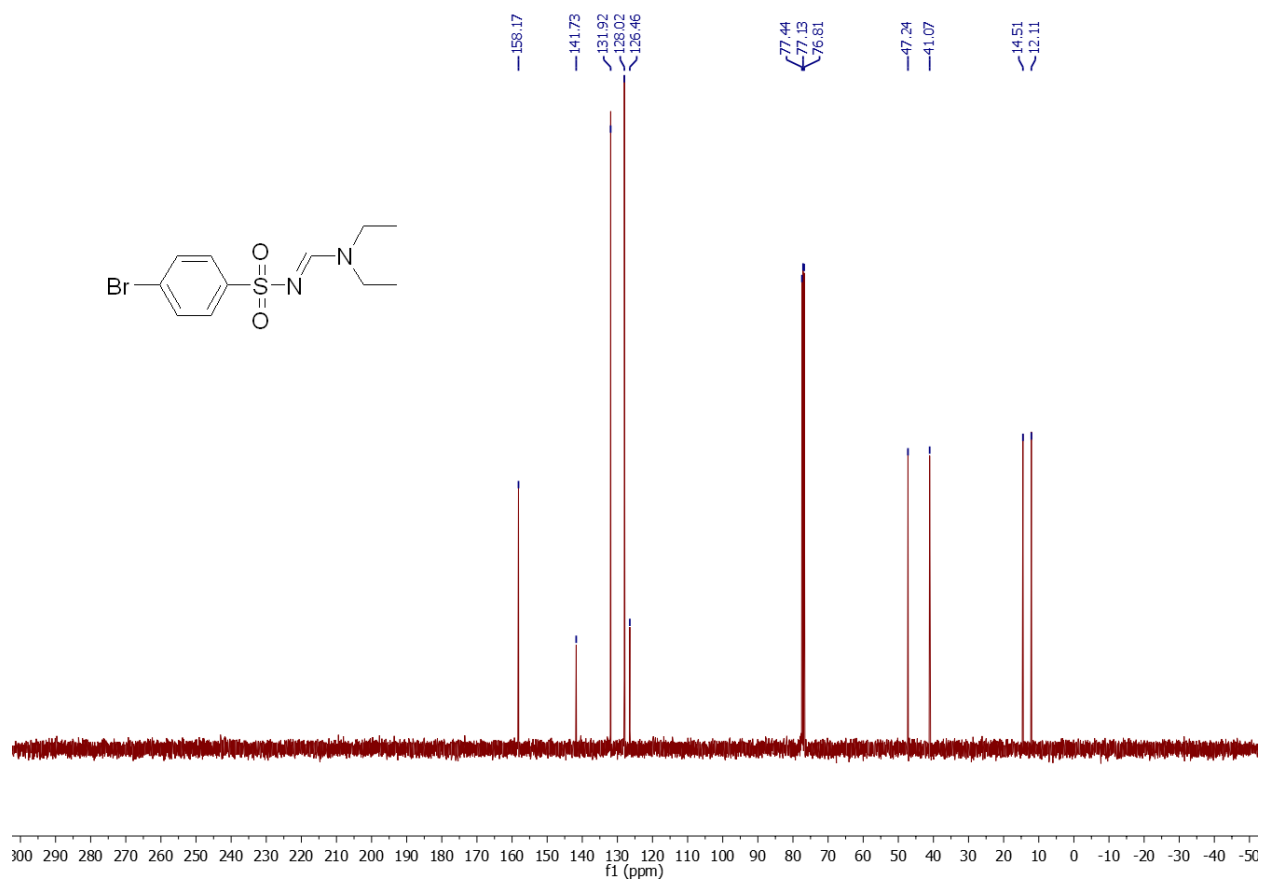

Figure S6:  $^{13}\text{C}$  NMR Spectra of **3c**

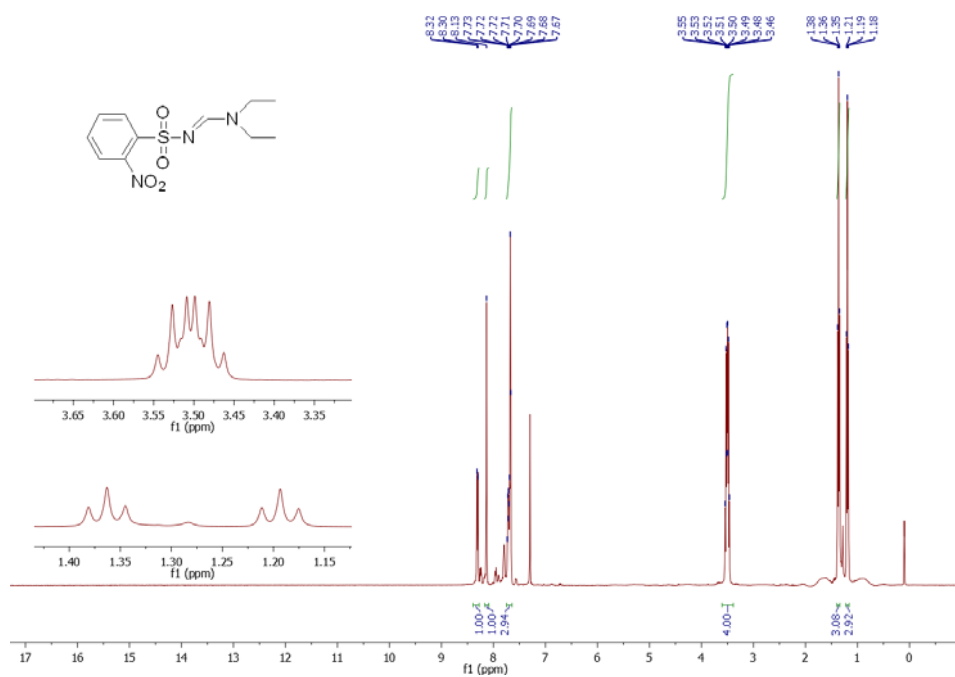

Figure S7:  $^1\text{H}$  NMR Spectra of **3d**

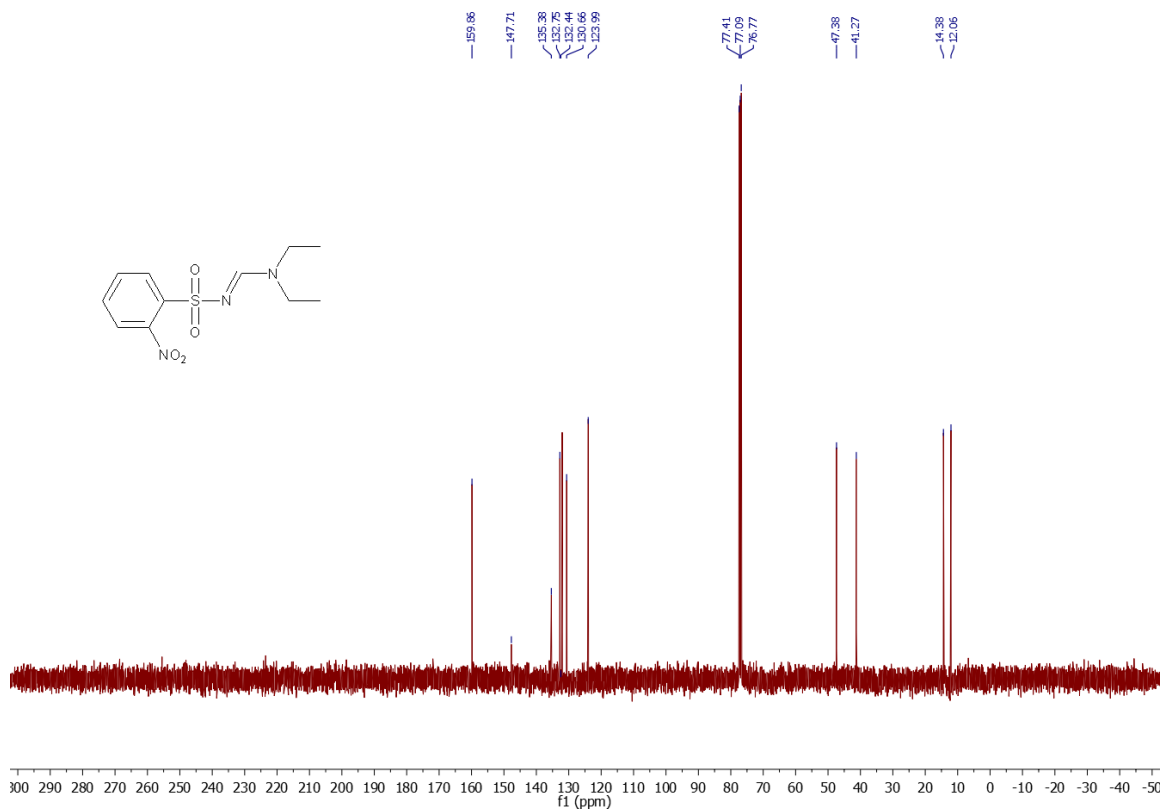

Figure S8:  $^{13}\text{C}$  NMR Spectra of **3d**

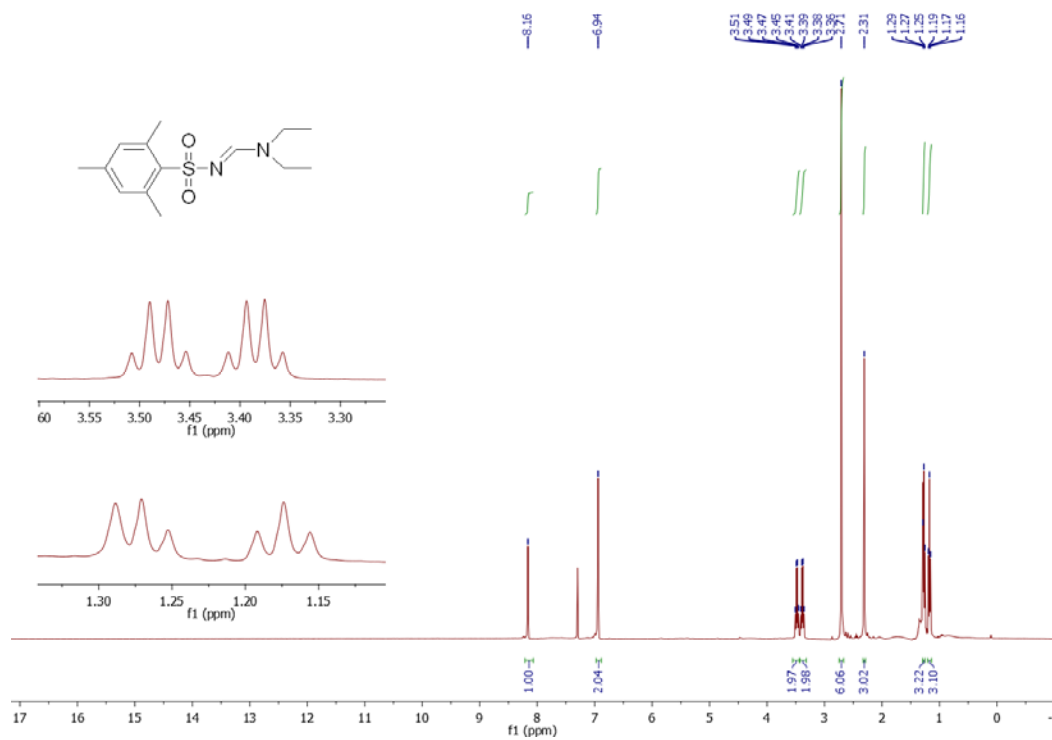

Figure S9: <sup>1</sup>H NMR Spectra of **3e**

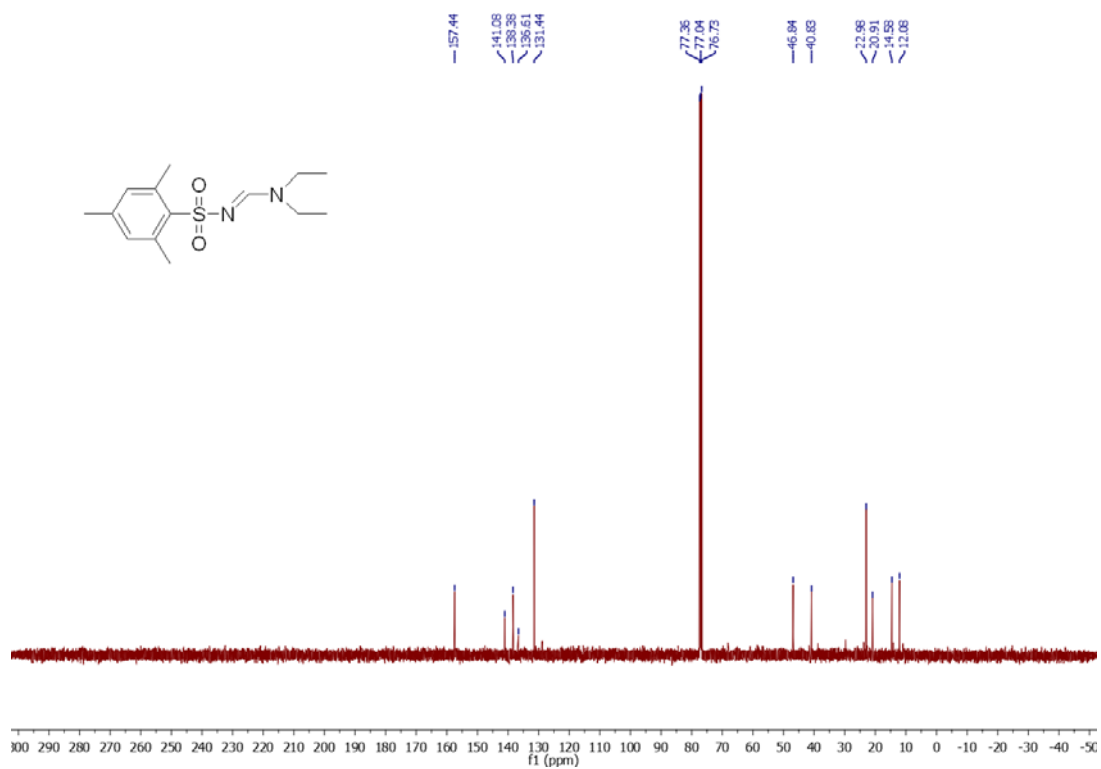

Figure S10: <sup>13</sup>C NMR Spectra of **3e**



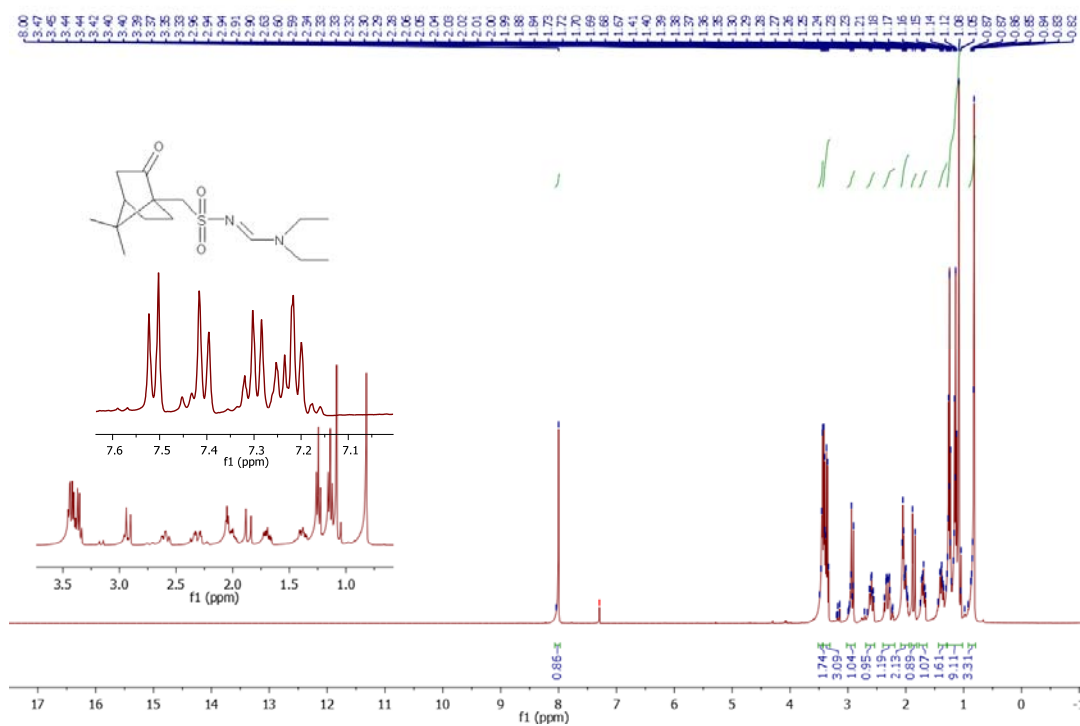

Figure S11: <sup>1</sup>H NMR Spectra of **3f**

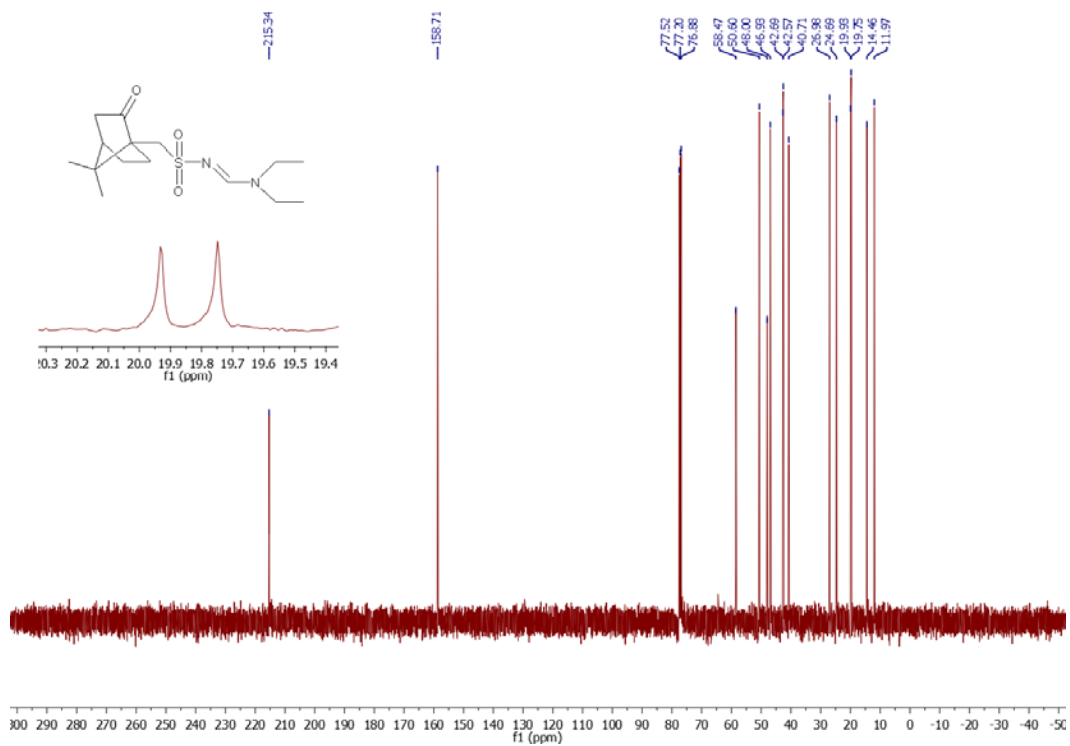

Figure S12: <sup>13</sup>C NMR Spectra of **3f**

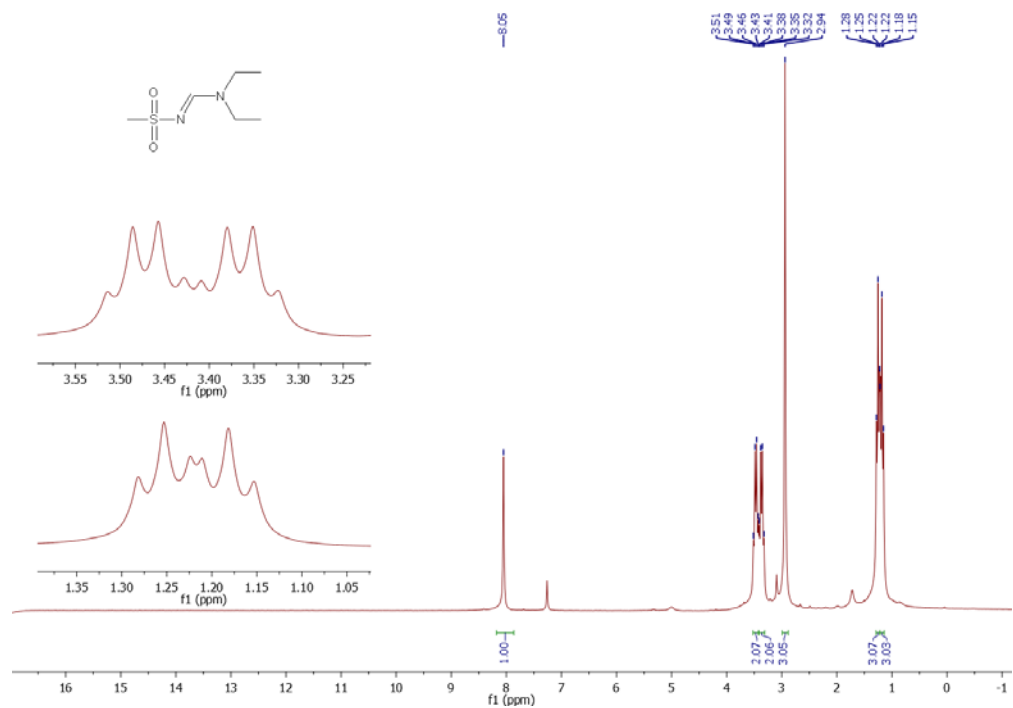

Figure S13: <sup>1</sup>H NMR Spectra of **3g**

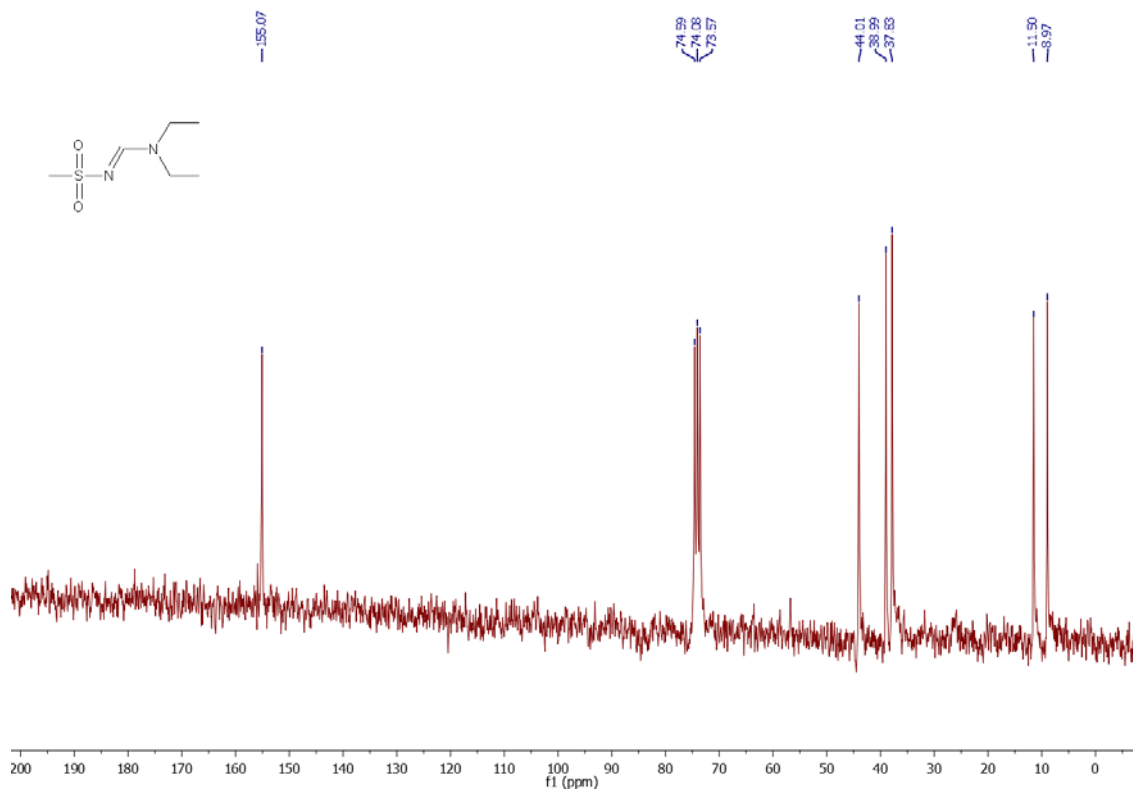

Figure S14: <sup>13</sup>C NMR Spectra of **3g**

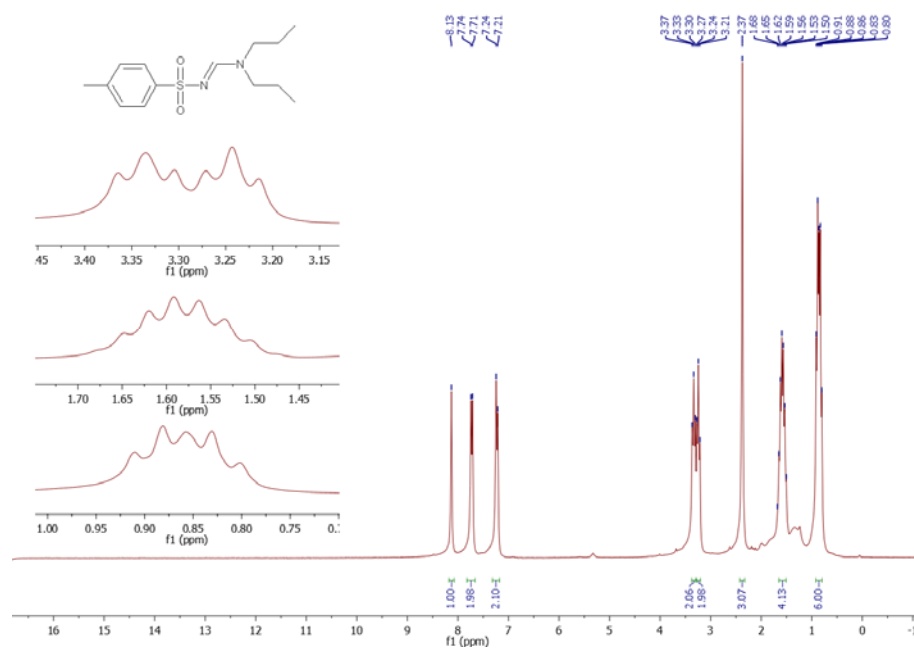

Figure S15: <sup>1</sup>H NMR Spectra of **3h**

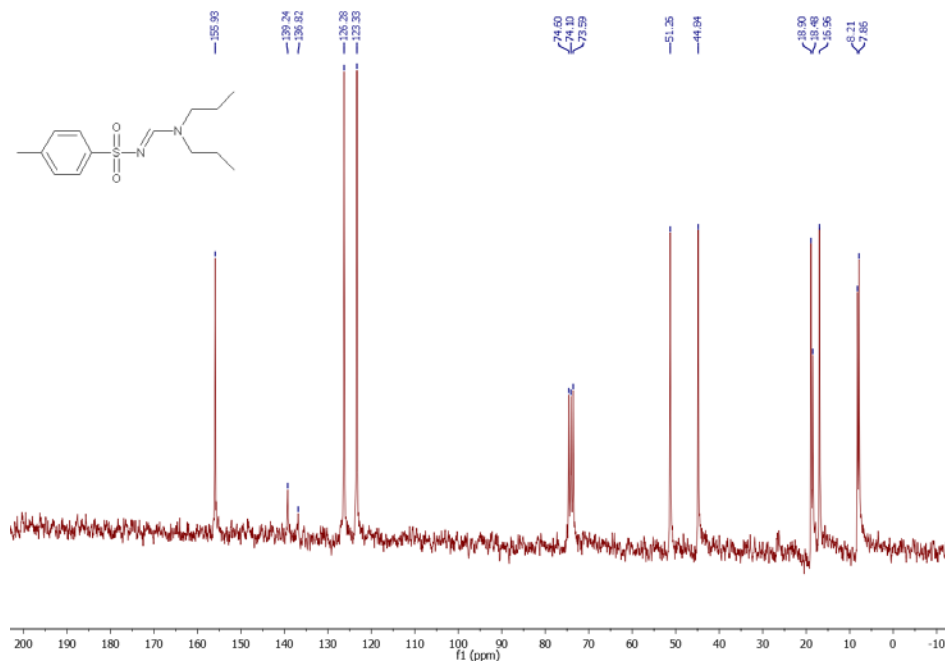

Figure S16: <sup>13</sup>C NMR Spectra of **3h**



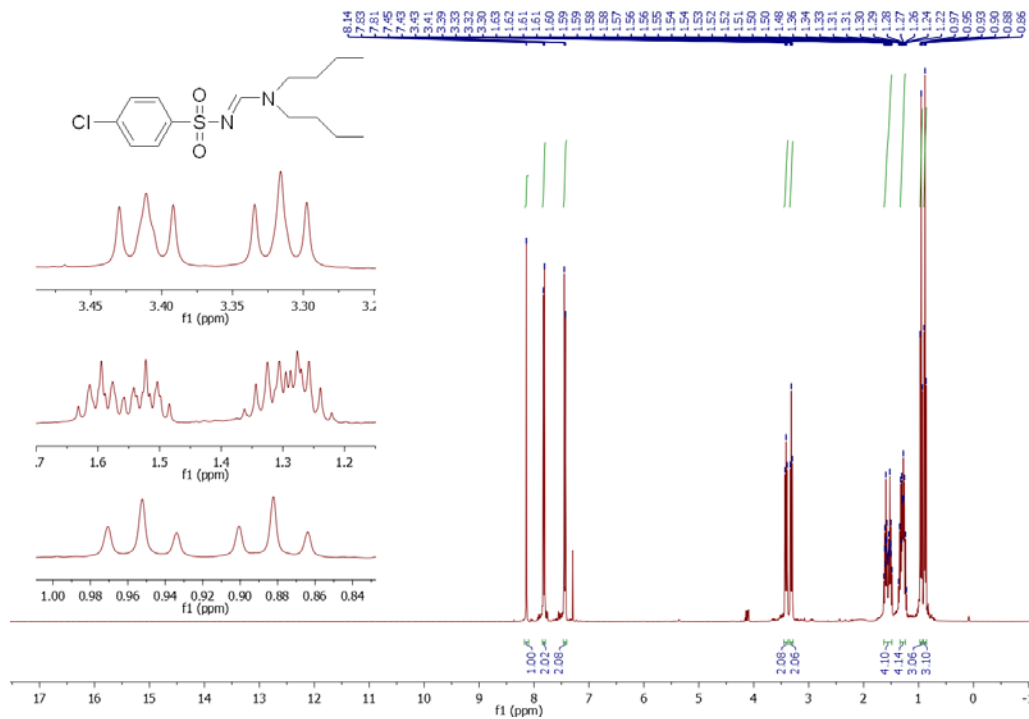

Figure S19: <sup>1</sup>H NMR Spectra of **3j**

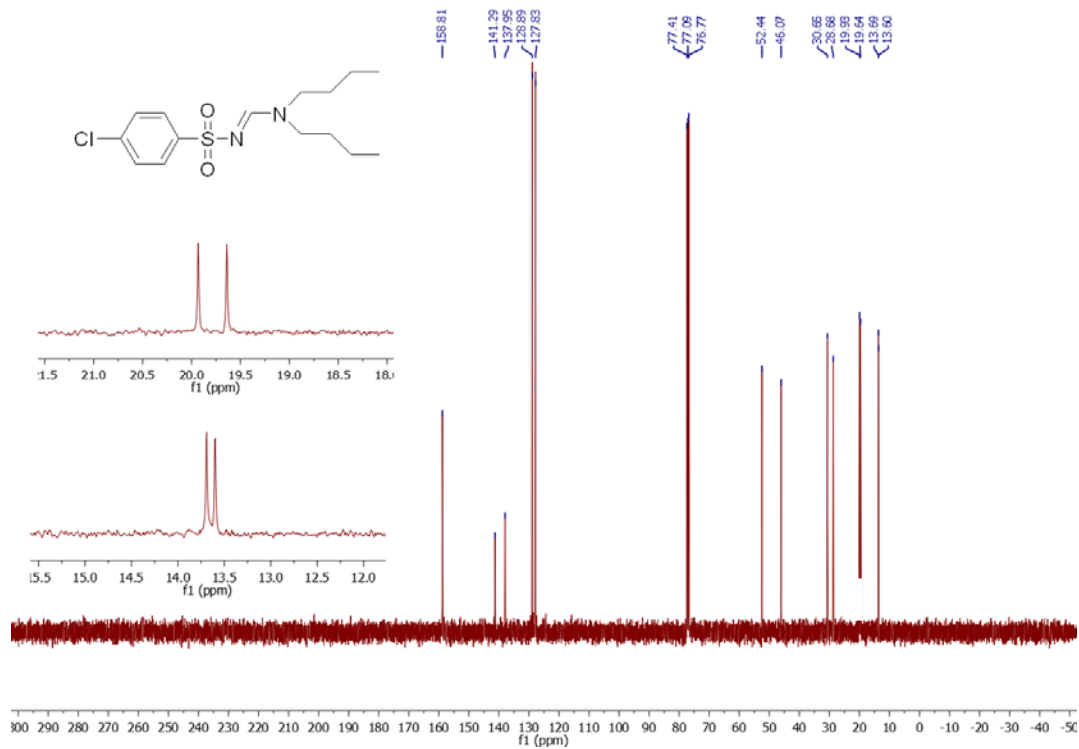

Figure S20: <sup>13</sup>C NMR Spectra of **3j**

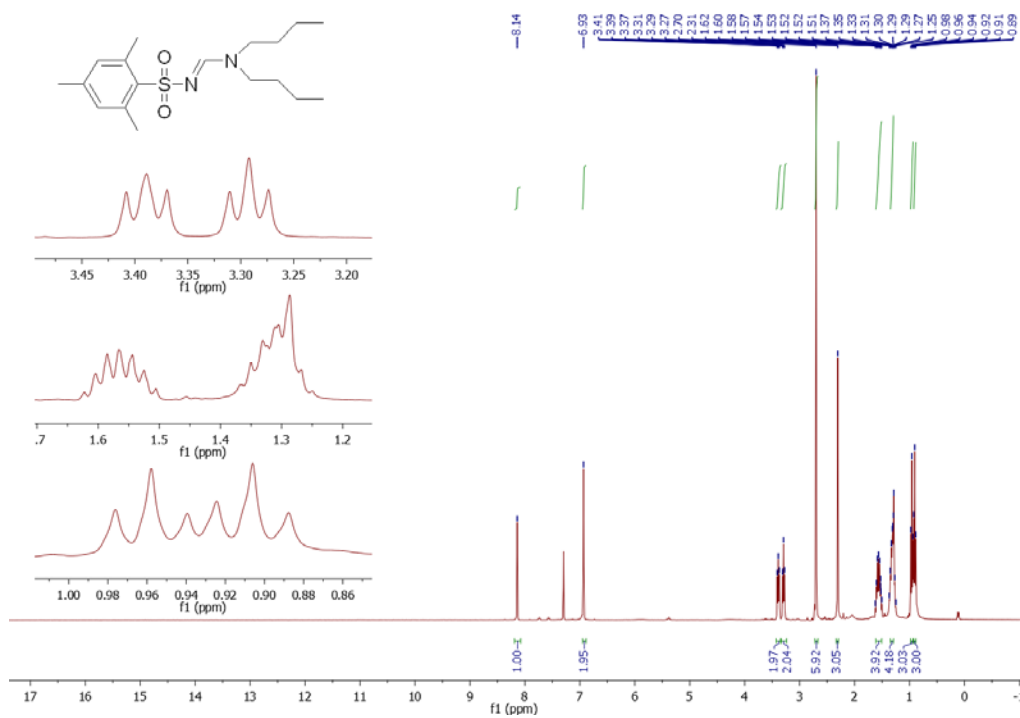

Figure S21: <sup>1</sup>H NMR Spectra of **3k**

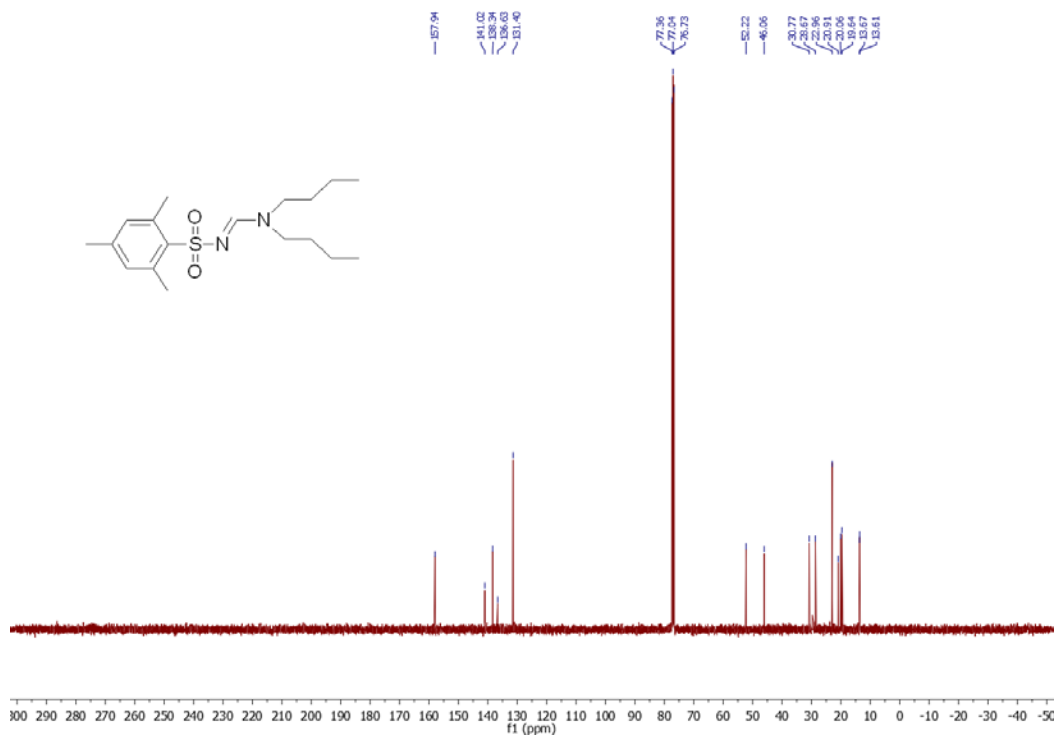

Figure S22: <sup>13</sup>C NMR Spectra of **3k**

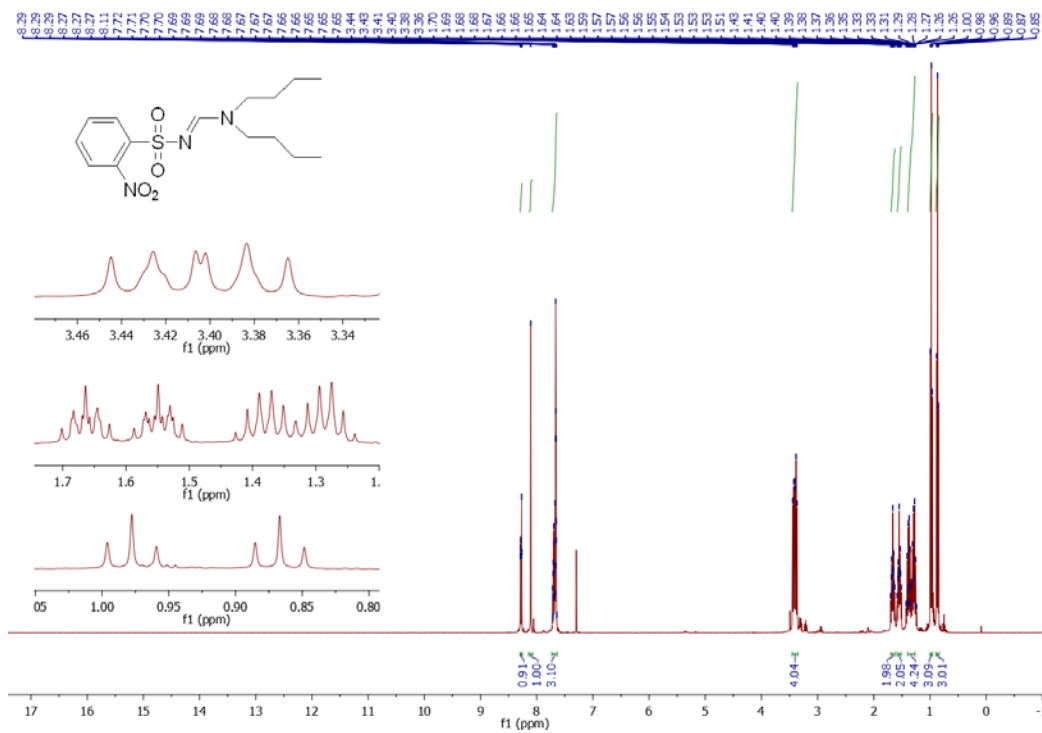

Figure S23: <sup>1</sup>H NMR Spectra of **3I**

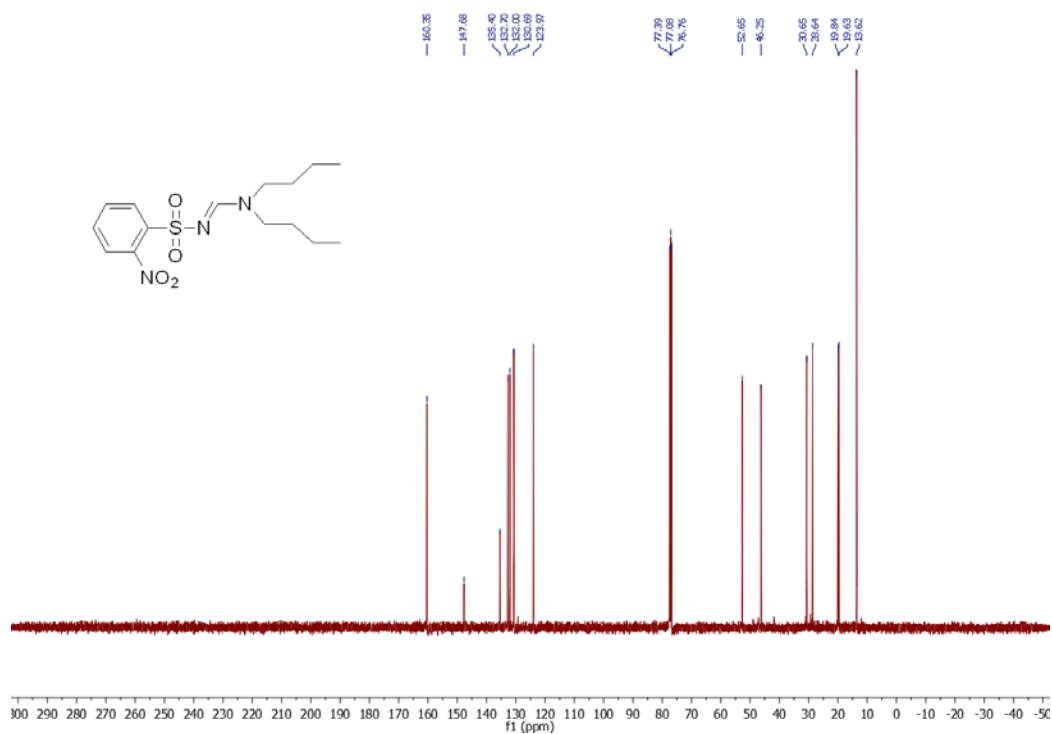

Figure S24: <sup>13</sup>C NMR Spectra of **3I**

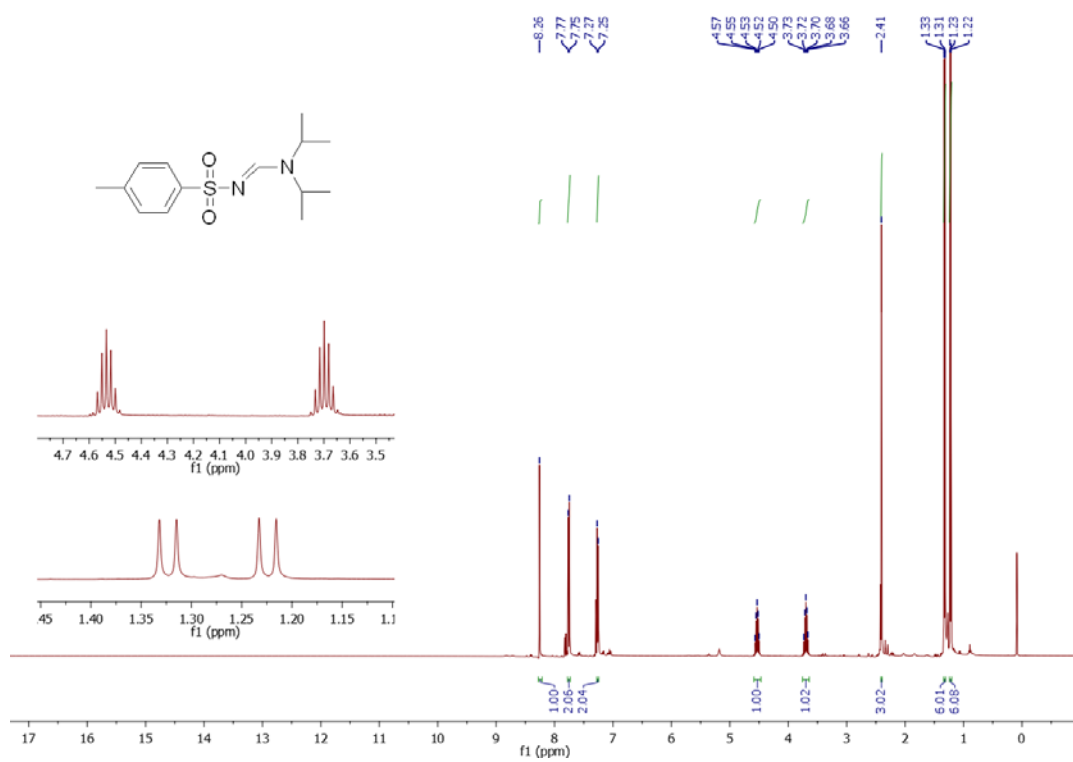

Figure S25: <sup>1</sup>H NMR Spectra of **3m**

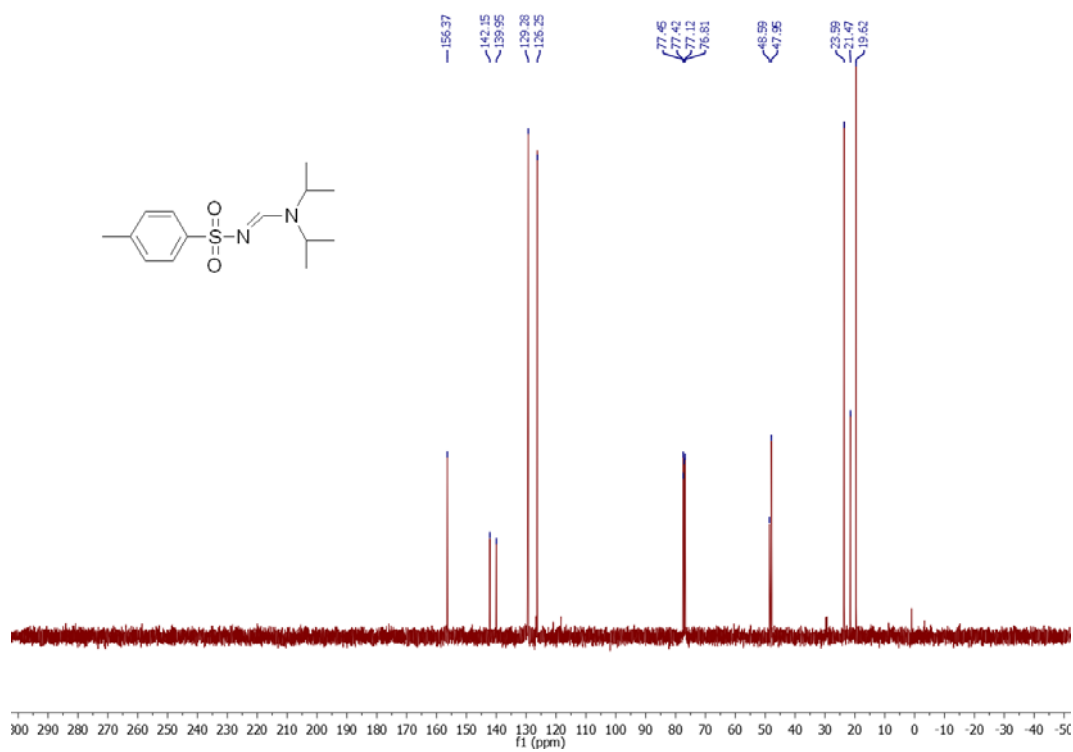

Figure S26: <sup>13</sup>C NMR Spectra of **3m**



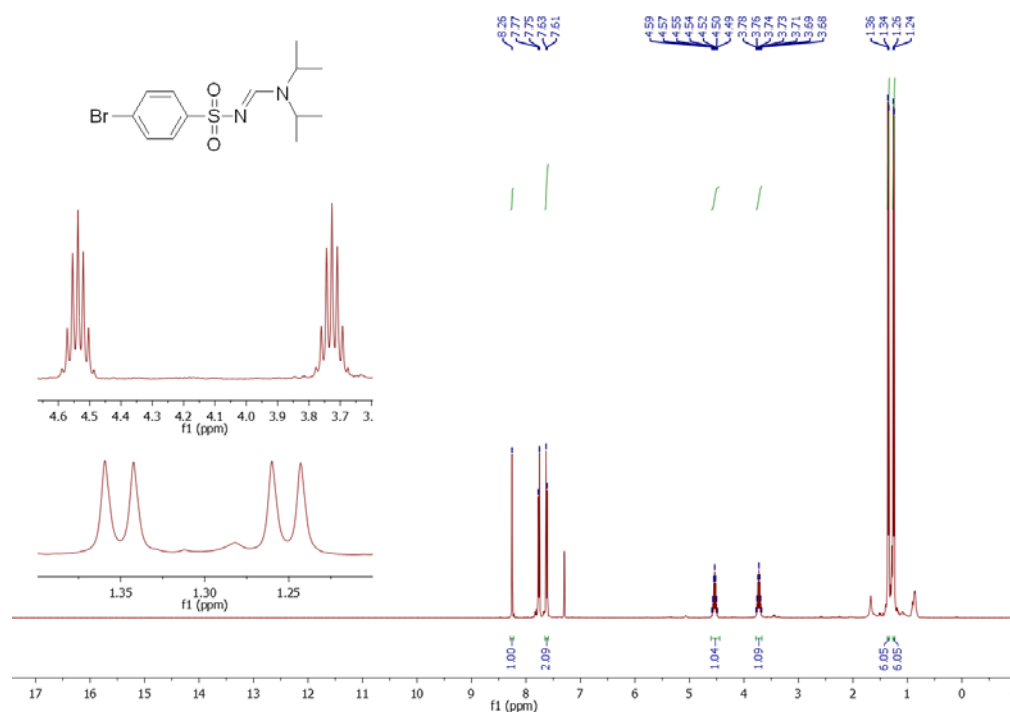

Figure S27: <sup>1</sup>H NMR Spectra of **3n**

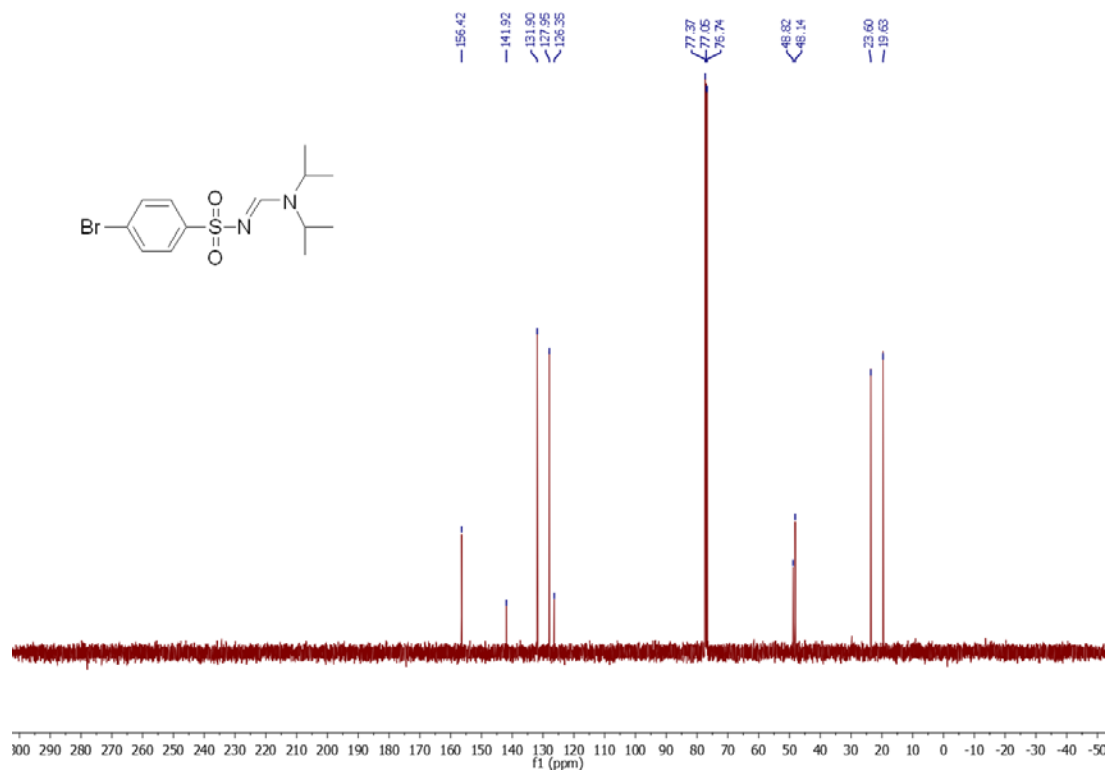

Figure S28: <sup>13</sup>C NMR Spectra of **3n**

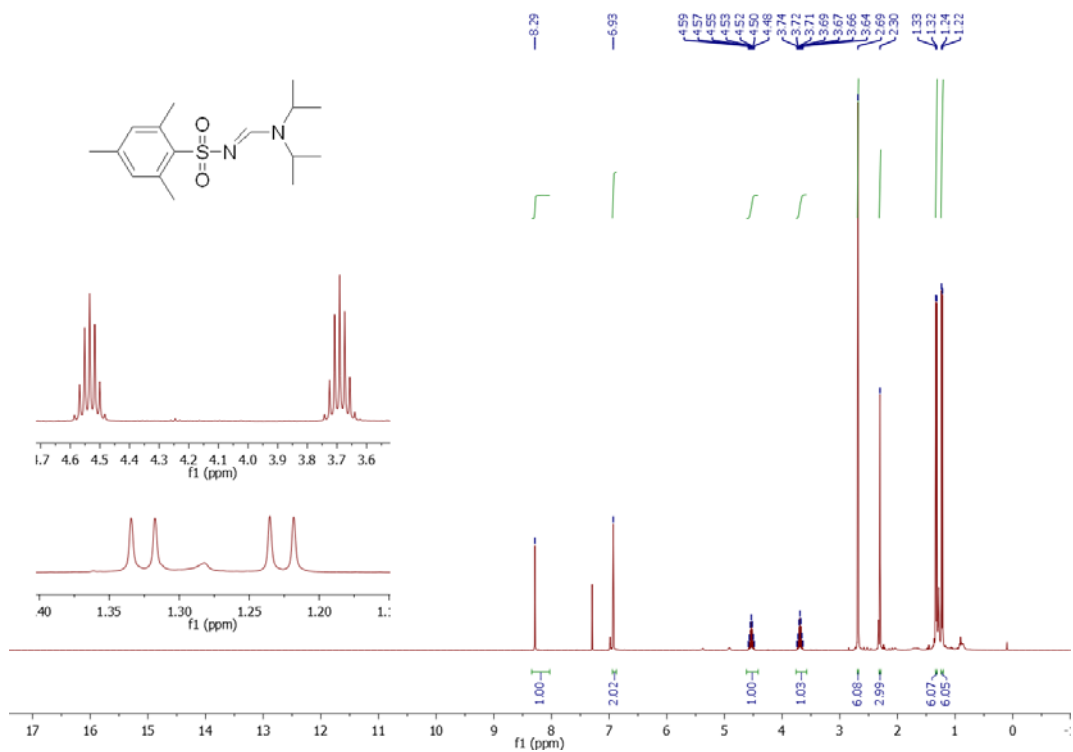

Figure S29: <sup>1</sup>H NMR Spectra of **3o**

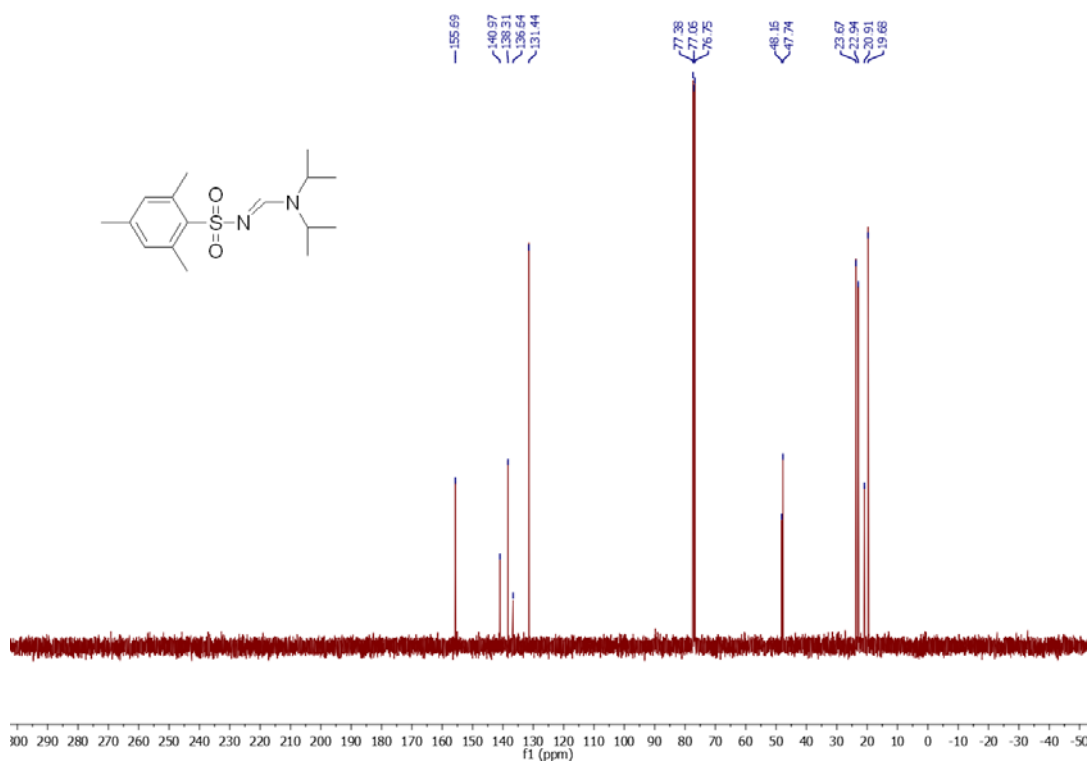

Figure S30: <sup>13</sup>C NMR Spectra of **3o**

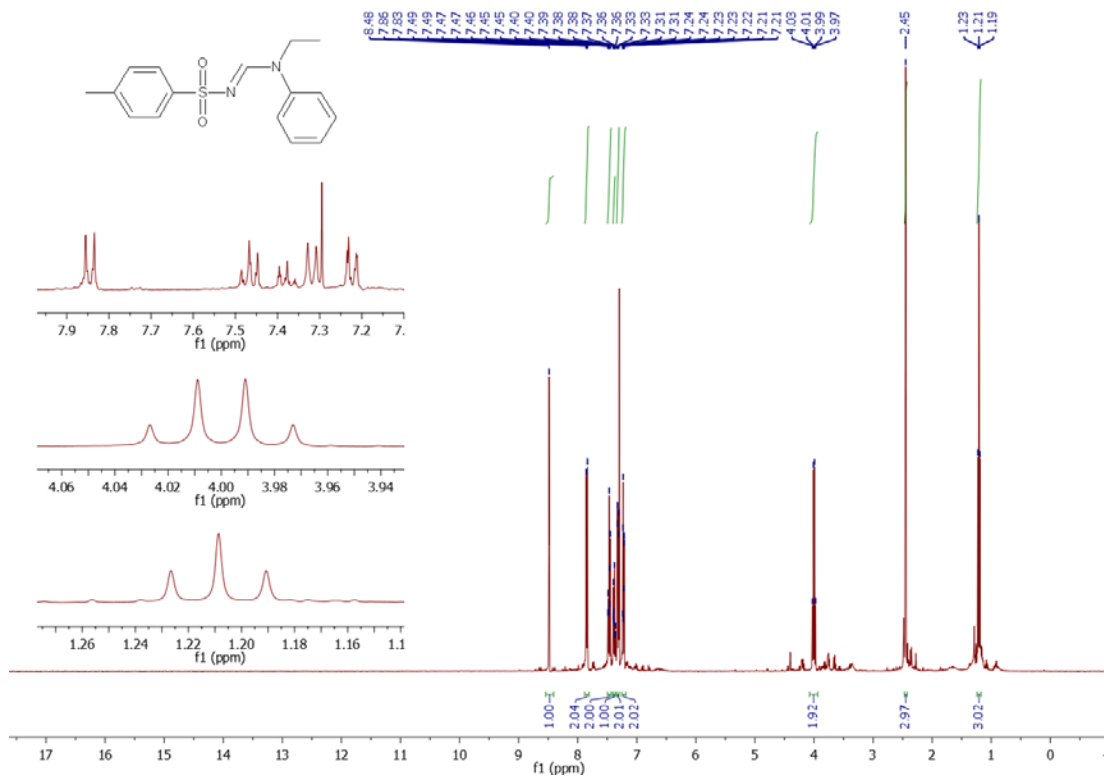

Figure S31:  $^1\text{H}$  NMR Spectra of **3p**

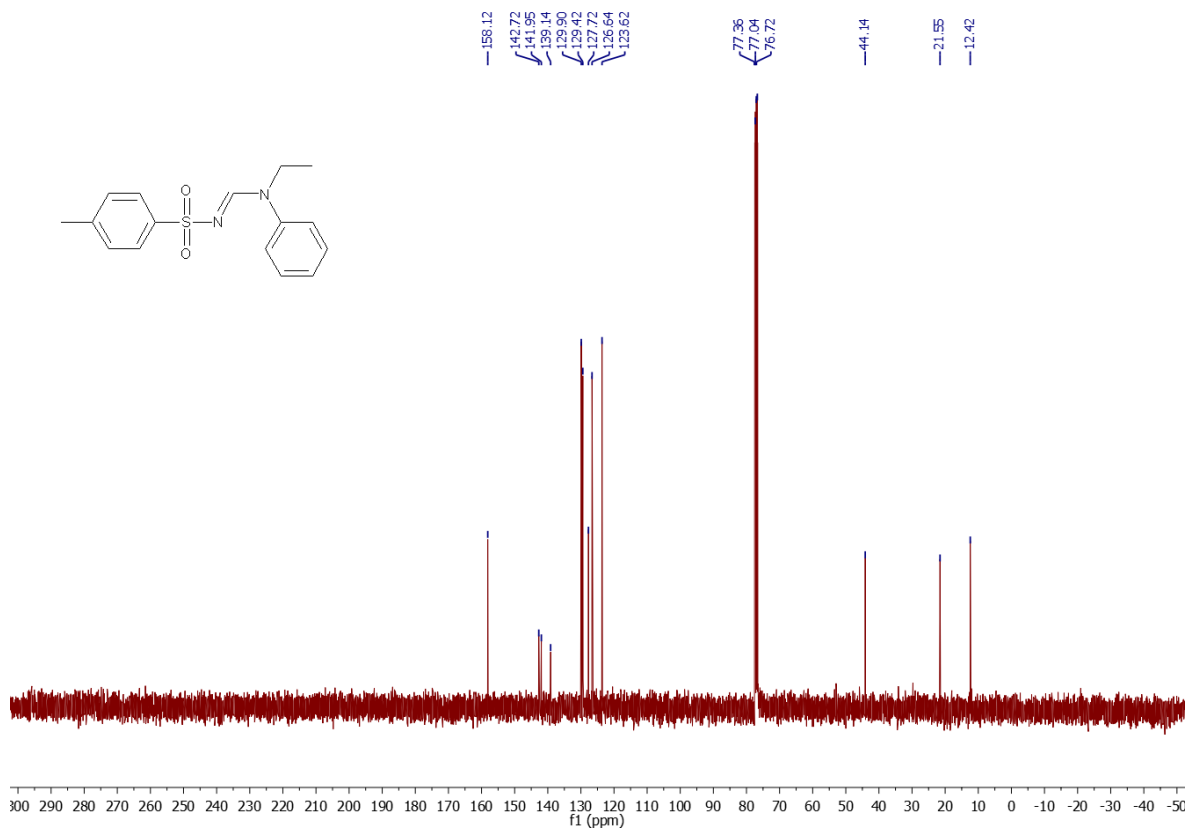

Figure S32:  $^{13}\text{C}$  NMR Spectra of **3p**

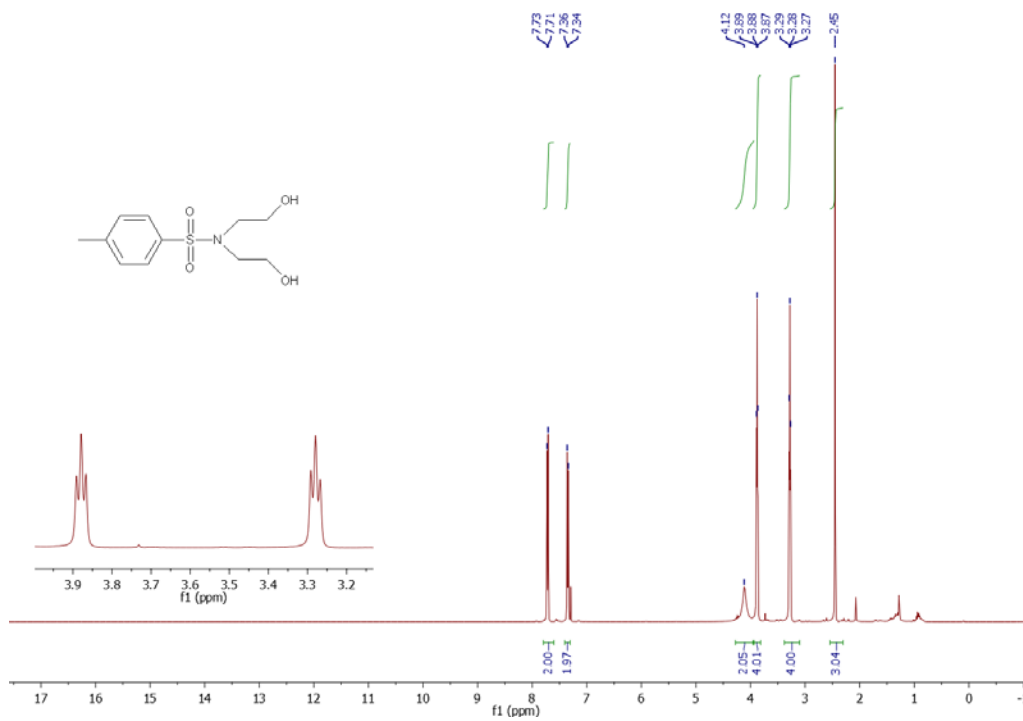

Figure S33: <sup>1</sup>H NMR Spectra of 4

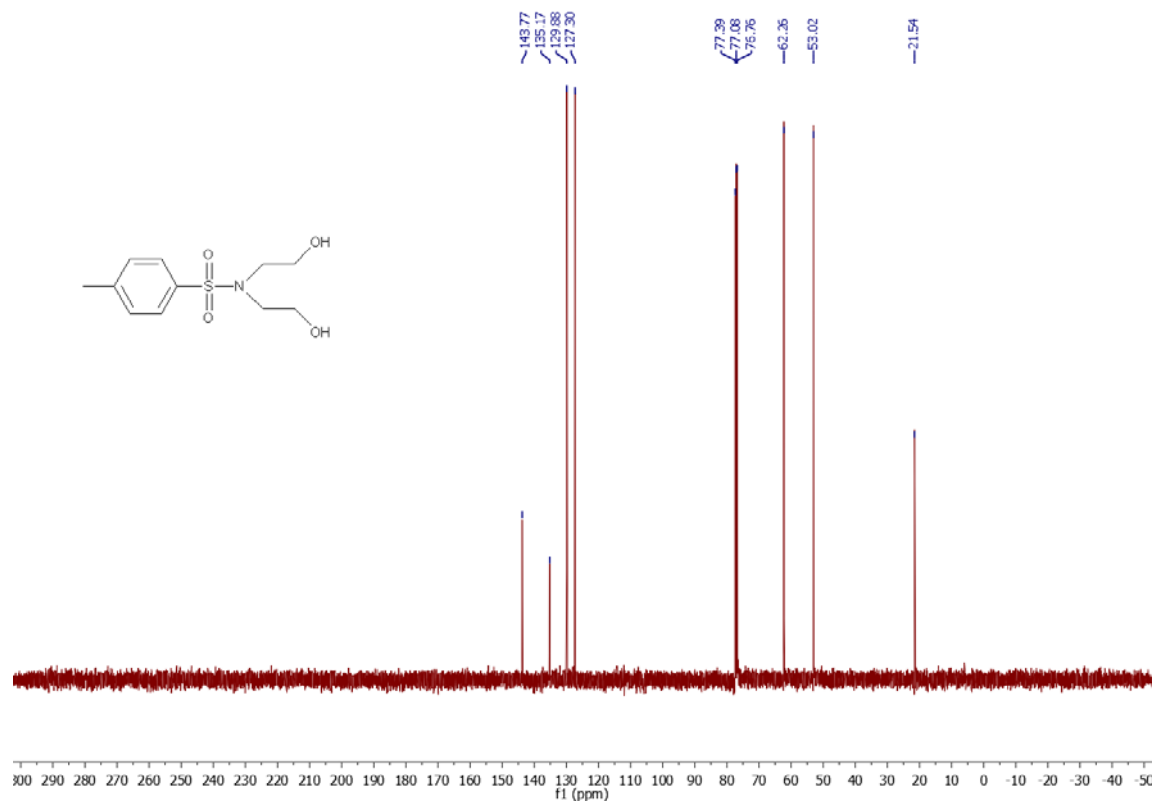

Figure S34: <sup>13</sup>C NMR Spectra of 4
